# Supplementary material for: Effects of submaximal training on the gut microbiota of forage-only horses
Source: Research Square preprint supplement (doi:10.21203/rs.3.rs-7835900/v1), 2025-11-04
Supplement: Supplementary file 1 [file 22c344a00e7fb199110ebdbc.xlsx]

## Sheet: Estat Filo
					Phylum	Treatment / Number of horses / Means and Standard Deviations*																								Test	Test	Test
						Crev30				Submax				Submax_C				Trev30				Week7				Week7_C				Value	Probability
						5				10				5				10				10				5
					Others	0.00538528	±	0.00174687	A	0.00644397	±	0.00289711	A	0.00710626	±	0.0038069	A	0.0079184	±	0.00365874	A	0.00590308	±	0.0029343	A	0.00671952	±	0.00378304	A	0.5927	0.7056	Tukey
					Actinobacteriota	0.0302137	±	0.00452984	A	0.0192836	±	0.0103306	A	0.0260369	±	0.0118848	A	0.0286957	±	0.00738498	A	0.0278718	±	0.00557239	A	0.0291598	±	0.00427865	A	2.1661	0.0784	Tukey
					Bacteroidota	0.198115	±	0.0428051	A	0.246548	±	0.0724318	A	0.215692	±	0.0471483	A	0.229537	±	0.0457059	A	0.198513	±	0.0444732	A	0.21166	±	0.047935	A	1.0592	0.398	Tukey
					Cyanobacteria	0.00350962	±	0.00255358	A	0.00151793	±	0.00149733	A	0.00203036	±	0.00178243	A	0.00217538	±	0.00149104	A	0.00147174	±	0.00074895	A	0.00097651	±	0.00040214	A	7.4811	0.1872	Kruskal-Wallis
					Euryarchaeota	0.0352606	±	0.0198554	A	0.0228802	±	0.0151186	A	0.065803	±	0.0984791	A	0.0294305	±	0.0178837	A	0.0395651	±	0.0146012	A	0.0711302	±	0.0517562	A	7.7787	0.1689	Kruskal-Wallis
					Firmicutes	0.512869	±	0.0275483	A	0.542792	±	0.0733442	A	0.486677	±	0.103548	A	0.529121	±	0.0417319	A	0.555072	±	0.0380226	A	0.523426	±	0.076575	A	0.9625	0.4528	Tukey
					Halobacterota	0.00119888	±	0.0006908	A	0.0024751	±	0.00244803	A	0.00429276	±	0.00628429	A	0.00402688	±	0.00689681	A	0.00779378	±	0.00744327	A	0.00195301	±	0.00096236	A	4.7637	0.4454	Kruskal-Wallis
					Planctomycetota	0.00326791	±	0.0010224	A	0.00177898	±	0.00089016	A	0.00285217	±	0.00181459	A	0.00335493	±	0.00223016	A	0.00242784	±	0.00131321	A	0.00222373	±	0.00106845	A	1.3843	0.2519	Tukey
					Proteobacteria	0.0541429	±	0.0770814	A	0.00979406	±	0.00828647	B	0.00644881	±	0.00408118	B	0.0247124	±	0.0275636	AB	0.00515647	±	0.00442698	B	0.00643914	±	0.00691318	B	15.8281	0.0074	Kruskal-Wallis
					Spirochaetota	0.0128203	±	0.00576236	A	0.017901	±	0.00735997	A	0.0159431	±	0.00706862	A	0.0180702	±	0.0108946	A	0.0152331	±	0.00577445	A	0.0159625	±	0.00429922	A	0.4389	0.8185	Tukey
					Verrucomicrobiota	0.143218	±	0.0510384	A	0.128585	±	0.0372644	A	0.167118	±	0.0512249	A	0.122958	±	0.0515287	A	0.140992	±	0.0431868	A	0.130349	±	0.018013	A	0.7997	0.5569	Tukey
					*: Values followed by the same letter, in the row, do not differ from each other according to the indicated test (p≤0.05)
