# Supplementary material for: Effects of submaximal training on the gut microbiota of forage-only horses
Source: Research Square preprint supplement (doi:10.21203/rs.3.rs-7835900/v1), 2025-11-04
Supplement: Supplementary file 2 [file 5ffbeb15ca30ec4d4bcd45b6.xlsx]

## Sheet: Betadiversity
	F.Model	R2	pval	p.adj
Submax vs Submax_C	1.6267	0.11121	0.008	0.02
Submax vs Trev30	1.2192	0.063434	0.132	0.198
Submax vs Crev30	1.6393	0.11198	0.005	0.015
Submax vs 7weeks	1.1569	0.063716	0.2	0.25875
Submax vs 7weeks_C	1.7332	0.11764	0.005	0.015
Submax_C vs Trev30	2.2576	0.14796	0.003	0.015
Submax_C vs Crev30	1.1606	0.1267	0.207	0.25875
Submax_C vs 7weeks	1.8154	0.13141	0.003	0.015
Submax_C vs 7weeks_C	1.0042	0.11153	0.423	0.452
Trev30 vs Crev30	1.4199	0.098466	0.051	0.095625
Trev30 vs 7weeks	1.108	0.061189	0.26	0.3
Trev30 vs 7weeks_C	1.8283	0.1233	0.005	0.015
Crev30 vs 7weeks	1.4087	0.10506	0.043	0.092143
Crev30 vs 7weeks_C	1.0686	0.11784	0.452	0.452
7weeks vs 7weeks_C	1.3213	0.099187	0.11	0.18333
