# Supplementary material for: Effects of submaximal training on the gut microbiota of forage-only horses
Source: Research Square preprint supplement (doi:10.21203/rs.3.rs-7835900/v1), 2025-11-04
Supplement: Supplementary file 3 [file 7c865a02ec55a34337b07d1c.xlsx]

## Sheet: Planilha1
Group	MC (kg)
	Mean
Submax_C	426a
Week7C	415a
Submax	404ab
Week7	389ac
