# Supplementary material for: Effects of submaximal training on the gut microbiota of forage-only horses
Source: Research Square preprint supplement (doi:10.21203/rs.3.rs-7835900/v1), 2025-11-04
Supplement: Supplementary file 4 [file 8ef31a9e415b7437da71a053.xlsx]

## Sheet: familia_estat_cronico_long_ed
Family	Treatment / Number of horses / Means and Standard Deviations*																								F Value	Pr<F
	Crev30				Submax				Submax_C				Trev30				Week7				Week7_C
	5				10				5				10				10				5
Acidaminococcaceae	0.016	±	0.007	A	0.022	±	0.005	A	0.015	±	0.007	A	0.029	±	0.005	A	0.025	±	0.005	A	0.017	±	0.007	A	0.97	0.4511
Akkermansiaceae	0.024	±	0.008	A	0.012	±	0.006	A	0.006	±	0.008	A	0.01	±	0.006	A	0.015	±	0.006	A	0.008	±	0.008	A	0.65	0.6637
Anaerovoracaceae	0.038	±	0.004	A	0.032	±	0.003	A	0.036	±	0.004	A	0.035	±	0.003	A	0.043	±	0.003	A	0.044	±	0.004	A	1.95	0.109
Bacteroidales_BS11_gut_group	0.007	±	0.002	A	0.012	±	0.002	A	0.013	±	0.002	A	0.005	±	0.002	A	0.008	±	0.002	A	0.011	±	0.002	A	2.44	0.0514
Bacteroidales_RF16_group	0.06	±	0.008	A	0.054	±	0.006	A	0.053	±	0.008	A	0.054	±	0.006	A	0.055	±	0.006	A	0.067	±	0.008	A	0.47	0.7942
Bacteroidales_UCG_001	0.019	±	0.003	A	0.015	±	0.002	A	0.012	±	0.003	A	0.022	±	0.002	A	0.022	±	0.002	A	0.02	±	0.003	A	2.06	0.0924
Christensenellaceae	0.007	±	0.002	A	0.01	±	0.001	A	0.009	±	0.002	A	0.011	±	0.001	A	0.01	±	0.001	A	0.008	±	0.002	A	0.68	0.6449
Eggerthellaceae	0.006	±	0.001	AB	0.003	±	0.001	B	0.01	±	0.001	A	0.003	±	0.001	B	0.004	±	0.001	B	0.005	±	0.001	AB	4.23	0.0037
Erysipelotrichaceae	0.034	±	0.004	A	0.03	±	0.003	A	0.034	±	0.004	A	0.026	±	0.003	A	0.03	±	0.003	A	0.025	±	0.004	A	0.9	0.4939
Eubacterium_coprostanoligenes_group	0.024	±	0.006	A	0.015	±	0.004	A	0.022	±	0.006	A	0.024	±	0.004	A	0.023	±	0.004	A	0.021	±	0.006	A	0.672	0.647
F082	0.01	±	0.003	A	0.011	±	0.002	A	0.012	±	0.003	A	0.01	±	0.002	A	0.011	±	0.002	A	0.014	±	0.003	A	0.35	0.8794
Hungateiclostridiaceae	0.129	±	0.019	A	0.194	±	0.014	A	0.155	±	0.019	A	0.196	±	0.014	A	0.191	±	0.014	A	0.182	±	0.019	A	2.37	0.0576
Lachnospiraceae	0.035	±	0.017	A	0.023	±	0.012	A	0.066	±	0.017	A	0.029	±	0.012	A	0.04	±	0.013	A	0.071	±	0.017	A	1.62	0.1774
Methanobacteriaceae	0.05	±	0.013	A	0.003	±	0.009	A	0.002	±	0.013	A	0.019	±	0.009	A	0.002	±	0.01	A	0.003	±	0.013	A	2.32	0.062
Oscillospiraceae	0.087	±	0.009	A	0.088	±	0.007	A	0.075	±	0.009	A	0.078	±	0.007	A	0.08	±	0.007	A	0.072	±	0.009	A	0.66	0.6532
p_251_o5	0.031	±	0.02	A	0.091	±	0.014	A	0.049	±	0.02	A	0.068	±	0.014	A	0.045	±	0.015	A	0.034	±	0.02	A	2.05	0.0934
Planococcaceae	0.044	±	0.013	A	0.011	±	0.009	A	0.006	±	0.013	A	0.007	±	0.009	A	0.034	±	0.01	A	0.014	±	0.013	A	1.99	0.1027
Prevotellaceae	0.048	±	0.007	A	0.06	±	0.005	A	0.049	±	0.007	A	0.062	±	0.005	A	0.053	±	0.005	A	0.056	±	0.007	A	0.85	0.5264
RF39	0.006	±	0.002	A	0.008	±	0.001	A	0.004	±	0.002	A	0.005	±	0.001	A	0.006	±	0.001	A	0.006	±	0.002	A	1.19	0.3344
Rikenellaceae	0.074	±	0.008	A	0.056	±	0.006	A	0.076	±	0.008	A	0.058	±	0.006	A	0.051	±	0.006	A	0.078	±	0.008	A	2.61	0.06
Ruminococcaceae	0.025	±	0.005	A	0.036	±	0.004	A	0.023	±	0.005	A	0.032	±	0.004	A	0.024	±	0.004	A	0.03	±	0.005	A	1.54	0.2006
Spirochaetaceae	0.013	±	0.003	A	0.018	±	0.002	A	0.016	±	0.003	A	0.018	±	0.002	A	0.015	±	0.003	A	0.016	±	0.003	A	0.43	0.8264
UCG_010	0.019	±	0.003	AB	0.02	±	0.002	AB	0.025	±	0.003	A	0.014	±	0.002	B	0.018	±	0.002	AB	0.017	±	0.003	AB	2.91	0.0255
uncultured	0.006	±	0.002	A	0.007	±	0.001	A	0.006	±	0.002	A	0.006	±	0.001	A	0.005	±	0.002	A	0.006	±	0.002	A	0.24	0.9411
WCHB1_41	0.119	±	0.02	A	0.116	±	0.014	A	0.161	±	0.02	A	0.113	±	0.014	A	0.126	±	0.015	A	0.122	±	0.02	A	0.87	0.5088
Others	0.07	±	0.008	A	0.053	±	0.006	A	0.063	±	0.008	A	0.068	±	0.006	A	0.066	±	0.006	A	0.054	±	0.008	A	1.2	0.3269
*: Values followed by the same letter, in the row, do not differ from each other according to Tukey’s test (p≤0.05)
