# Supplementary material for: Effects of submaximal training on the gut microbiota of forage-only horses
Source: Research Square preprint supplement (doi:10.21203/rs.3.rs-7835900/v1), 2025-11-04
Supplement: Supplementary file 5 [file b220e76a6c6ec3456c81691c.xlsx]

## Sheet: pH todos
Group	pH
Crev30	6.546	±	0.473951	B
Submax_C0	7.004	±	0.274099	AB
Submax	7.089	±	0.196494	A
Trev30	6.963	±	0.287327	AB
Week7	6.963	±	0.287327	AB
Week7_c	6.936	±	0.226892	AB
Values followed by the same letter do not differ from each other according to Tukey’s test (p≥0.05)
