# Supplementary material for: Effects of submaximal training on the gut microbiota of forage-only horses
Source: Research Square preprint supplement (doi:10.21203/rs.3.rs-7835900/v1), 2025-11-04
Supplement: Supplementary file 6 [file c09d9ad6c3868cc4688b7eb4.xlsx]

## Sheet: ESTAT GENERO
Genus	Treatment / Number of horses / Means and Standard Deviations*																								Test	Test	Test
	Crev30				Submax				Submax_C				Trev30				Week7				Week7_C				Value	Probability
	5				10				5				10				10				5
Phascolarctobacterium	0.0160688	±	0.00706946	A	0.0219472	±	0.0178595	A	0.0153244	±	0.00840162	A	0.0287199	±	0.01484	A	0.0246275	±	0.0177686	A	0.0172387	±	0.00729607	A	5.2853	0.3821	Kruskal-Wallis
Akkermansia	0.0242773	±	0.0296443	A	0.0122015	±	0.0160163	A	0.00581069	±	0.00607815	A	0.0099681	±	0.00741672	A	0.0153351	±	0.0287217	A	0.00838248	±	0.00820279	A	3.1894	0.6708	Kruskal-Wallis
Family_XIII_AD3011_group	0.00762835	±	0.00186144	A	0.0111235	±	0.00974548	A	0.00778304	±	0.00319386	A	0.00674369	±	0.00240311	A	0.0151686	±	0.00813548	A	0.0190757	±	0.00980778	A	15.9039	0.71	Kruskal-Wallis
Christensenellaceae_R7_group	0.0575462	±	0.0142162	A	0.0468143	±	0.0190952	A	0.0483902	±	0.0147033	A	0.0521077	±	0.0147315	A	0.0531009	±	0.0186368	A	0.0643334	±	0.0221819	A	0.81	0.5516	Tukey
Eggerthellaceae_uncultured	0.0126462	±	0.00503123	A	0.0100261	±	0.00536966	A	0.00793774	±	0.00318642	A	0.0154307	±	0.00626689	A	0.0142394	±	0.00382704	A	0.014957	±	0.00665308	A	2.22	0.0724	Tukey
Eubacterium_coprostanoligenes_group	0.0338103	±	0.00886955	A	0.0300251	±	0.0112619	A	0.033704	±	0.0168073	A	0.0259161	±	0.00687885	A	0.0300096	±	0.00694357	A	0.0249541	±	0.00598839	A	0.9	0.4939	Tukey
F082	0.0236102	±	0.0114635	A	0.014957	±	0.0115607	A	0.0218989	±	0.0056409	A	0.0243885	±	0.0161688	A	0.023188	±	0.0142238	A	0.0210577	±	0.0110421	A	0.67	0.647	Tukey
Lachnospiraceae	0.0533694	±	0.0201043	A	0.0753505	±	0.0237055	A	0.0608431	±	0.0193895	A	0.0793	±	0.0164292	A	0.0717393	±	0.0144903	A	0.0688098	±	0.00704106	A	1.81	0.1345	Tukey
Lachnospiraceae_AC2044_group	0.0195978	±	0.0111173	A	0.0296481	±	0.0117988	A	0.0227594	±	0.00951797	A	0.0258774	±	0.00874446	A	0.0301385	±	0.0119568	A	0.02478	±	0.00863925	A	0.98	0.4446	Tukey
Lachnospiraceae_UC009	0.00955235	±	0.00605043	A	0.0140336	±	0.00972651	A	0.0104902	±	0.00572428	A	0.0160447	±	0.0145537	A	0.0159528	±	0.00935618	A	0.0124239	±	0.00502349	A	3.6666	0.5983	Kruskal-Wallis
Lachnospiraceae_XPB1014_group	0.0113023	±	0.00669892	C	0.028512	±	0.0125996	A	0.0276225	±	0.0129163	AB	0.0187325	±	0.00717942	BC	0.0273615	±	0.00716895	AB	0.0239679	±	0.00659281	AB	3.3	0.0143	Tukey
Methanobrevibacter	0.0352606	±	0.0198554	A	0.0228802	±	0.0151186	A	0.065803	±	0.0984791	A	0.0294305	±	0.0178837	A	0.0395651	±	0.0146012	A	0.0711302	±	0.0517562	A	7.7787	0.1689	Kruskal-Wallis
Acinetobacter	0.0496181	±	0.0788713	A	0.00320023	±	0.00528473	A	0.00235908	±	0.0032786	A	0.0187035	±	0.0291789	A	0.00181551	±	0.00381351	A	0.00283283	±	0.00633441	A	8.9477	0.1112	Kruskal-Wallis
Oscillospiraceae_NK4A214_group	0.045045	±	0.0118139	A	0.0466209	±	0.012516	A	0.0490187	±	0.0112286	A	0.0360437	±	0.0096615	A	0.0444369	±	0.00827253	A	0.0447162	±	0.00765666	A	1.54	0.1994	Tukey
Oscillospiraceae_UC002	0.0143382	±	0.0183448	A	0.015131	±	0.0108282	A	0.00425409	±	0.00303593	A	0.0110896	±	0.0076031	A	0.012354	±	0.00918327	A	0.00498888	±	0.00416518	A	11.7251	0.388	Kruskal-Wallis
Oscillospiraceae_UC005	0.0110316	±	0.00411821	AB	0.0145461	±	0.00640487	AB	0.00962003	±	0.0040841	B	0.0173112	±	0.00878861	A	0.0121231	±	0.00465463	AB	0.0122595	±	0.00525756	AB	1.47	0.2227	Tukey
p_251_o5	0.0311225	±	0.0195387	A	0.0910809	±	0.0716884	A	0.0491057	±	0.0345903	A	0.0677656	±	0.034139	A	0.0451352	±	0.0352365	A	0.0343421	±	0.021505	A	10.8354	0.547	Kruskal-Wallis
Planococcaceae	0.0233298	±	0.0406212	A	0.00647781	±	0.0108714	A	0.00346128	±	0.00458988	A	0.00443778	±	0.00475686	A	0.0222963	±	0.0191086	A	0.00739631	±	0.0140884	A	4.7645	0.4453	Kruskal-Wallis
Prevotellaceae_UC001	0.0146379	±	0.00447566	A	0.0183989	±	0.00820279	A	0.0151407	±	0.00721626	A	0.0166925	±	0.00338017	A	0.0140943	±	0.00773701	A	0.0160205	±	0.0112874	A	0.41	0.8369	Tukey
Prevotellaceae_UC003	0.0102678	±	0.00700228	A	0.0161317	±	0.00727445	A	0.0140965	±	0.00613081	A	0.0165039	±	0.00562634	A	0.0158293	±	0.00773316	A	0.0114957	±	0.0076682	A	0.9	0.4906	Tukey
Rikenellaceae_RC9_gut_group	0.0677463	±	0.0189749	AB	0.047143	±	0.0169728	C	0.0685971	±	0.0323323	AB	0.0493039	±	0.0125573	BC	0.0456884	±	0.0128177	C	0.0693609	±	0.0154017	A	2.86	0.0273	Tukey
Ruminococcus	0.0131973	±	0.00602957	A	0.0232863	±	0.0100774	A	0.0131683	±	0.00951369	A	0.0213284	±	0.00971266	A	0.0132564	±	0.0104609	A	0.0192207	±	0.0223271	A	8.6262	0.1249	Kruskal-Wallis
Treponema	0.0125882	±	0.00571913	A	0.0174804	±	0.00730736	A	0.0156918	±	0.00708424	A	0.0177366	±	0.0108814	A	0.015131	±	0.00579024	A	0.0157014	±	0.00428084	A	0.4	0.8439	Tukey
UC010	0.0185246	±	0.00470972	ABC	0.0203326	±	0.00675916	AB	0.0254762	±	0.011275	A	0.0135309	±	0.00319125	C	0.0177039	±	0.0049728	BC	0.0172484	±	0.00501562	BC	2.91	0.0255	Tukey
WCHB1_41	0.11894	±	0.0499718	A	0.116354	±	0.0406981	A	0.16122	±	0.0537791	A	0.112985	±	0.0499739	A	0.125657	±	0.045732	A	0.121938	±	0.0210755	A	0.87	0.5088	Tukey
Others	0.264942	±	0.015732	A	0.246297	±	0.0401139	A	0.240423	±	0.0388059	A	0.263908	±	0.0276104	A	0.254053	±	0.0385327	A	0.251368	±	0.0327324	A	0.53	0.749	Tukey
*: Values followed by the same letter, in the row, do not differ from each other according to the indicated test (p≤0.05)
