# Supplementary material for: Effects of submaximal training on the gut microbiota of forage-only horses
Source: Research Square preprint supplement (doi:10.21203/rs.3.rs-7835900/v1), 2025-11-04
Supplement: Supplementary file 7 [file e6a8bfb70b0a1e71402cfd5b.xlsx]

## Sheet: Forage
Parâmetro	Tanzania - Paddock 1 - Pre-training	Massai - Paddock 3 - Week 1	Tanzania - Paddock 3 - Week 1	Tanzania - Paddock 4 - Week 2	Massai - Paddock 4 - Week 2	Tanzania - Paddock 2 - Week 3	Massai - Paddock 2 - Week 3	Tanzania - Paddock 1 - Week 4	Tanzania - Paddock 3 - Week 5	Massai - Paddock 3 - Week 5	Tanzania - Paddock 4 - Week 7	Massai - Paddock 4 - Week 7	Tanzania - Paddock 1 - Recovery (30 days)	Mean ± SD
Dry matter (%)	23.85	23.63	24.46	26.22	28.3	21.67	23.98	21.71	26.55	24.19	20.52	23.79	18.43	23.64 ± 2.62
Crude protein (%DM)	11.29	10.72	12.24	12.65	8.61	13.72	10.84	13.43	11.59	9.18	15.2	11.59	18.91	12.31 ± 2.67
NDF (%DM)	71.25	68.59	64.24	73.89	74.21	62.46	69.57	71.11	65.04	69.87	60.01	68.51	57.23	67.38 ± 5.23
ADF (%DM)	40.1	38.22	38.05	40.22	41.33	36.7	38.15	38.93	40.78	40.46	36.12	38.78	32.35	38.48 ± 2.41
Lignin (%DM)	3.83	2.63	2.83	2.94	3.94	2.71	2.66	2.71	2.94	3.44	2.72	2.72	2	2.93 ± 0.53
Ether extract (%DM)	2.71	3.64	2.96	2.68	2.85	3.38	3.95	2.74	3.3	3.33	3.36	3.13	3.68	3.21 ± 0.41
Starch (%DM)	2.44	1.37	2.8	2.78	0.84	1.56	1.02	2.17	0.98	0.81	2.34	3.75	0.98	1.83 ± 0.94
Sugars (ASA) (%DM)	4.63	5.21	6.98	8.2	2.74	6.69	4.42	9.71	4.55	4.33	6.06	7.32	8.97	6.14 ± 2.06
Ash (%DM)	9.8	11.37	9.98	11.91	10.88	10.82	11.05	9.48	14.27	9.94	13.15	10.67	11.35	11.13 ± 1.36
Non-fibrous carbohydrates (%DM)	10.34	14.59	16.3	5.18	10.97	15.47	12.94	8.53	15.42	15.02	15.36	13.46	14.57	12.93 ± 3.29
Calcium (%DM)	0.35	0.42	0.44	0.44	0.35	0.49	0.36	0.28	0.55	0.38	0.53	0.36	0.54	0.42 ± 0.09
Phosphorus (%DM)	0.36	0.37	0.35	0.33	0.33	0.38	0.39	0.37	0.35	0.33	0.42	0.35	0.46	0.37 ± 0.04
Magnesium (%DM)	0.21	0.26	0.22	0.29	0.23	0.23	0.22	0.23	0.27	0.25	0.26	0.25	0.27	0.25 ± 0.02
Potassium (%DM)	3.12	3.05	2.78	2.66	2.79	2.86	3.53	3.1	3.01	2.62	3.61	2.87	3.56	3.04 ± 0.34
Sulfur (%DM)	0.16	0.19	0.19	0.19	0.14	0.22	0.18	0.2	0.18	0.16	0.21	0.21	0.28	0.19 ± 0.03
Chloride (%DM)	0.65	0.56	0.44	0.68	0.61	0.65	0.57	0.61	0.52	0.39	0.78	0.94	0.63	0.62 ± 0.14
TDN (%DM)	57.66	59.13	59.26	57.57	56.7	60.31	59.18	58.57	57.13	57.38	60.76	58.69	63.7	58.93 ± 1.88

## Sheet: Statistical
Parameter	Statistical test	p-value
Dry matter (%)	ANOVA	0.8582
Crude protein (%DM)	ANOVA	0.9876
Neutral detergent fiber (NDF) (%DM)	ANOVA	0.9698
Acid detergent fiber (ADF) (%DM)	ANOVA	0.9826
Non-fibrous carbohydrates (NFC) (%DM)	Kruskal-Wallis	0.4729
Soluble sugars (ASA) (%DM)	ANOVA	0.9411
Starch (%DM)	ANOVA	0.7493
